# Supplementary material for: Magnetic nanoparticle-facilitated rapid mass production of high affinity polymeric materials (nanoMIPs) for protein recognition and biosensing
Source: Royal Society of Chemistry journal article supplement (doi:10.1039/d4bm00990h), 2024-01-01
Supplement: d4bm00990h1.pdf [file d4bm00990h1.pdf]

## Supplementary Information

### 1. Theoretical Calculations

#### Theoretical Calculations for 10 min ramp time particles:

The MNP@CHO (120 nm), MNP@protein (330 nm) and nanoMIPs (125 nm) are modelled as spheres and their diameters are taken from DLS measurements. Assume protein has diameter 5 nm (BHb).

#### Theoretical/ Particle Geometry considerations:

Assuming protein attachment to MNP@CHO gives a 100% monolayer, we can determine the number of protein molecules attached to each MNP surface

Surface area (SA) of MNP@CHO (120 nm diameter with radius  $r_1$ ):

$$SA = 4\pi r_1^2$$

Area (A) of protein (radius  $r_2 = 2.5$  nm):  $\pi r_2^2$

$$\text{Total number of protein molecules} = SA/A = 4r_1^2/r_2^2 = 4 \times 900 = 2304$$

Therefore, theoretically, we can have 2304 protein molecules packed tightly on one MNP@CHO particle.

Our DLS data indicates that the hydrated MNP particle size increases to 330 nm upon protein attachment (MNP@protein; radius  $r_3 = 165$  nm). NanoMIPs with particle size 125 nm (radius  $r_4 = 63$  nm). Therefore, we can theoretically determine how many nanoMIP particles each MNP@protein can produce:

$$SA = 4\pi r_3^2$$

Area (A) of nanoMIP (radius  $r_4 = 63$  nm):  $\pi r_4^2$

$$\text{Total number of protein molecules} = SA/A = 4r_3^2/r_4^2 = 27.4$$

Therefore, theoretically, we can have 27.4 nanoMIP particles produced for every one MNP@protein particle.

#### Experimental considerations:

#### Magnetic nanoparticle volume in a 10 mg MNP batch:

From DLS ( $r_1$  for MNP@CHO = 60 nm)

$$\text{Volume per MNP@CHO particle: } V_1 = 4/3\pi r_1^3 = 2.16 \times 10^{-22} \text{ m}^3 = 2.16 \times 10^{-16} \text{ cm}^3$$

Assuming the density of an iron oxide core nanoparticle to be 5.15 g/cm<sup>3</sup>, then 10 mg of MNP@CHO can be approximated to have a total volume of V<sub>2</sub>:

$$V_2 = 0.01/5.15 = 0.001942 \text{ cm}^3$$

Therefore estimated no. of MNP@CHO particles in 10 mg

$$= V_2/V_1 \cdot 0.001942/2.16 \times 10^{-16} = 8.990 \times 10^{12} \text{ particles.}$$

With 27.4 nanoMIP particles theoretically being produced per MNP particle, we can then say that 10 mg in 1 mL suspension can generate:  $27.4 \times 8.990 \times 10^{12} = 2.463 \times 10^{14}$  nanoMIP particles/ mL.

However, our experimental data (Fig. 3) suggests that only 0.6 mg of protein is taken up by 10 mg of MNP@CHO.

$$\begin{aligned} \text{No of protein molecules in 0.6mg of BHp} &= ((0.6 \times 10^{-3}) / 64500) \times 6.022 \times 10^{23} \\ &= 5.60279 \times 10^{15} \text{ protein molecules} \end{aligned}$$

Therefore, actual number of protein molecules adsorbed per particle

$$= 5.60279 \times 10^{15} / 8.990 \times 10^{12} = 623.25 \text{ protein molecules per MNP@CHO particle}$$

Note: our geometric calculation for a tightly packed MNP sphere suggested: 2304 protein molecules per particle.

$$\text{Therefore \% actual protein coverage per MNP@CHO particle} = (623.25/2304) \times 100 = 27.05\%$$

It is not unreasonable that each MNP is only 27% decorated with protein, when taking into account steric hindrance during protein conjugation reaction with MNP@CHO.

Further, with 27.4 nanoMIP particles being theoretically produced per MNP@protein particle, we can say that each nanoMIP particle theoretically has  $623.25/27.4 = 23$  protein recognition (binding) sites.

Therefore, during protein rebinding on nanoMIP:

$$\text{Ratio of protein molecules bound : nanoMIP particles} = 25:1.$$

## 2. Figures

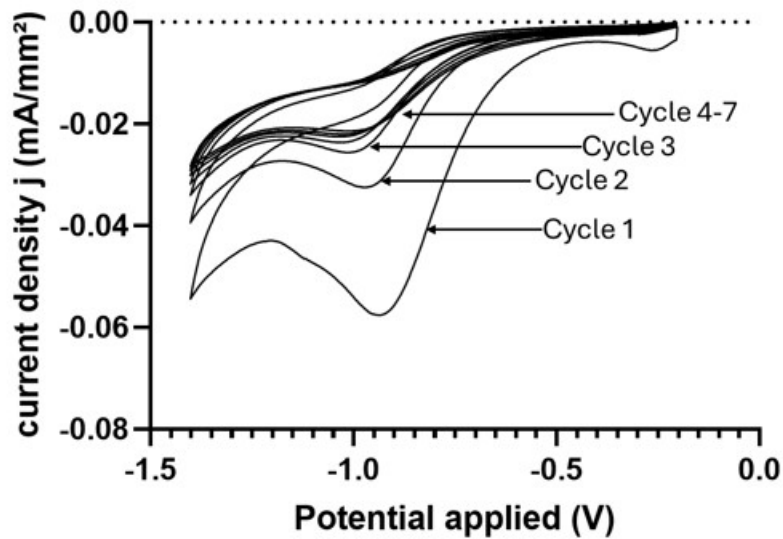

**Fig S1a** Entrapment of nanoMIPs within an electropolymerized layer (E-layer) on a BT-Au screen-printed electrode (SPE). Cyclic voltammetry was employed, utilizing a potential range of -0.2 V to -1.4 V vs the Ag/AgCl reference (7 cycles) at a scan rate of  $50 \text{ mV s}^{-1}$ . The peak cathodic peak decreases with each cycle representing progressive E-layer formation during nanoMIP entrapment.

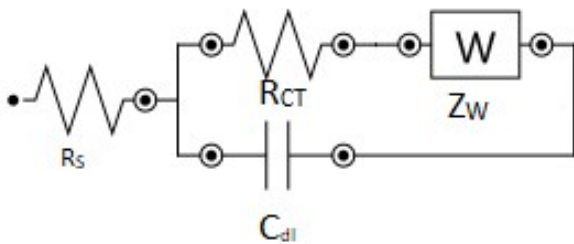

**Fig. S1b** Randles Equivalent Circuit model used to determine charge transfer resistance ( $R_{CT}$ ) from electrochemical impedance spectra of bare and nanoMIP-loaded disposable BT-Au SPCEs.

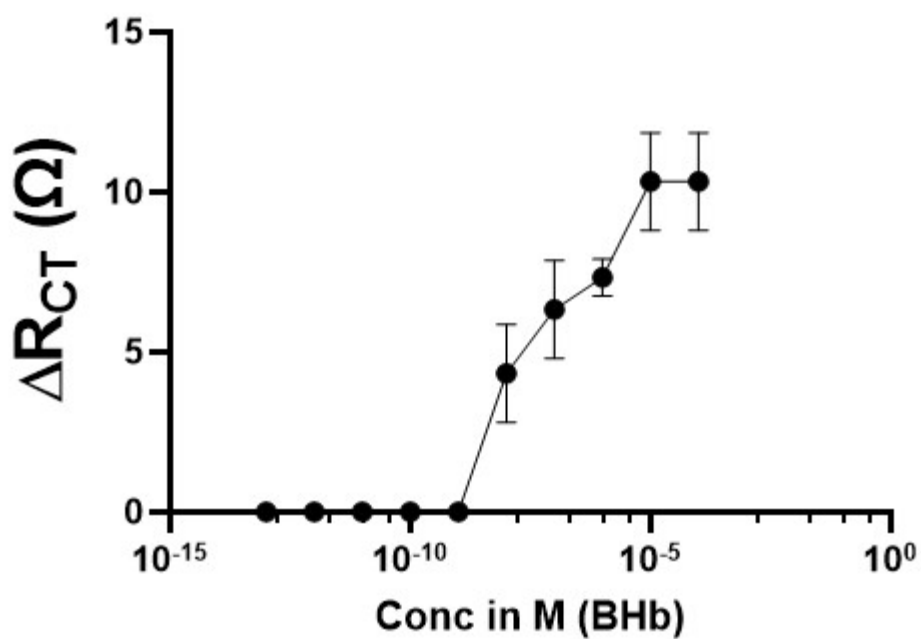

Fig. S2 NanoNIP islands linear range (this is control polymer (nanoNIP) and gives very little signal; a few ohms compared to 100s of ohms with nanoMIP)

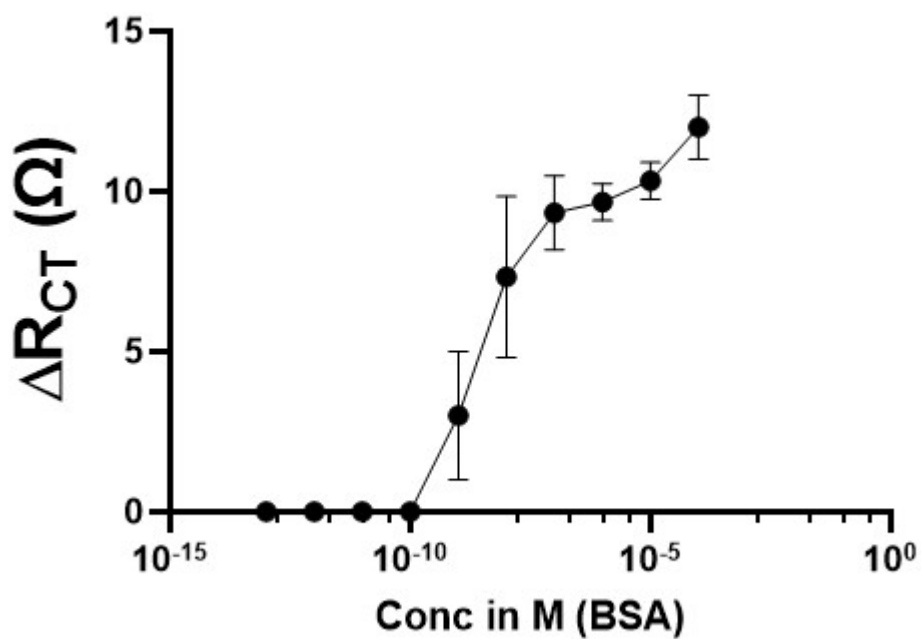

Fig S3 BHb nanoMIP islands cross-bound with bovine serum albumin
